# Supplementary material
Source: publisher site journal article supplement (https://www.dovepress.com/article/256781)
Supplement: Supplementary file 1 [file get_supplementary_file.php]

**Supplementary Table 1- Treatment steps based on OST manual**

1- Approaching the rat cage.

2- Touching and holding (catching) the cage.

3- Opening the cage door by the subject.

4- Looking at rats and describing them.

5- The rat is restrained (handled) by the therapist and the subject looks at it.

6- Taking a rat by the therapist and touching by the subject.

7- Try to get hands close to the rat and touch it without anyone's help.

8- Subject hold the rat in the cage with the whole hand.

9- When the rat is in the cage, the subject holds the rat's tail without anyone's help.

10- The subject grabs the rat by the whole hand and raises it.

11- The subject raises the rat with its tail.

12- The subject completely handles the rat.
